# Supplementary material
Source: MDPI journal article supplement (https://www.mdpi.com/2071-1050/15/2/940)
Supplement: s1 [file s1 › sustainability-2041153-supplementary.pdf]

Table S1

| Primary author (year of publication) | Country   | Research method | Research paradigm | Data sources                                         | Sample size | Educational context | Educational Stage   | Learning outcome | Type of GPBL |
|--------------------------------------|-----------|-----------------|-------------------|------------------------------------------------------|-------------|---------------------|---------------------|------------------|--------------|
| Callaghan (2016)                     | Australia | Mixed           | 3                 | Observations,<br>questionnaires,<br>texts, artifacts | 168         | Out-of-class        | Secondary<br>School | A, E             | 3            |
| Gabriele et al. (2017)               | Italy     | Quantitative    | 1                 | Tests,<br>questionnaires                             | 136         | In-class            | University          | E                | 3            |
| Díaz-Lauzurica et al. (2019)         | Spain     | Qualitative     | 3                 | Observations,<br>interviews,<br>texts                | 8           | In-class            | Secondary<br>School | A, B, E, F       | 3            |
| Ke et al. (2019)                     | China     | Mixed           | 4                 | Tests,<br>interviews,                                | 10          | Out-of-class        | Secondary<br>School | C, D, E, F       | 3            |

|                      |               |              |   |                                                                  |     |              |                         |             |   |
|----------------------|---------------|--------------|---|------------------------------------------------------------------|-----|--------------|-------------------------|-------------|---|
|                      |               |              |   | observations                                                     |     |              |                         |             |   |
| Ke et al. (2019)     | China         | Mixed        | 4 | Tests,<br><br>interviews,<br><br>observations                    | 10  | Out-of-class | Secondary<br><br>School | C, D, E , F | 3 |
| Hewett et al. (2020) | United States | Qualitative  | 3 | Observations,<br><br>interviews,<br><br>artifacts                | 13  | Out-of-class | Secondary<br><br>School | A, C        | 3 |
| Punia et al. (2020)  | India         | Quantitative | 2 | Artifacts,<br><br>questionnaires                                 | 240 | In-class     | University              | B           | 3 |
| Wang (2020)          | China         | Mixed        | 2 | Questionnaire,<br><br>interviews,<br><br>artifacts,<br><br>tests | 186 | In-class     | Primary<br><br>School   | D, E, F     | 3 |

|                        |                   |             |   |                                                 |    |              |                                         |      |   |
|------------------------|-------------------|-------------|---|-------------------------------------------------|----|--------------|-----------------------------------------|------|---|
| Kapralos et al. (2015) | Canada            | Mixed       | 3 | Questionnaires,<br>interviews                   | 40 | In-class     | University                              | E    | 4 |
| Gestwicki et al (2016) | United States     | Qualitative | 3 | Interviews,<br><br>observations,<br><br>texts   | -  | Out-of-class | University                              | -    | 4 |
| Prigmore et al. (2016) | United<br>Kingdom | Qualitative | 3 | Interviews                                      | 3  | Out-of-class | University                              | -    | 4 |
| Baran et al. (2018)    | Turkey            | Mixed       | 2 | Tests,<br><br>questionnaires,<br><br>interviews | 34 | In-class     | Secondary<br><br>School                 | D, E | 4 |
| Costa et al. (2018)    | Portugal          | Mixed       | 3 | Questionnaires                                  | 58 | In-class     | Primary<br><br>School,<br><br>Secondary | B    | 4 |

|                        |                    |              |   |                                     |     |          |                                  |         |   |
|------------------------|--------------------|--------------|---|-------------------------------------|-----|----------|----------------------------------|---------|---|
|                        |                    |              |   |                                     |     |          | school                           |         |   |
| Topalli et al. (2018)  | Turkey             | Quantitative | 2 | Tests                               | 395 | In-class | University                       | D       | 4 |
| Arnab et al. (2019)    | United Kingdom     | Quantitative | 3 | Questionnaires, observations, texts | 122 | In-class | University                       | A, E    | 4 |
| Gaeta et al. (2019)    | Spain, Austria, UK | Quantitative | 4 | Questionnaires                      | 308 | In-class | Primary school, Secondary school | A, B, E | 4 |
| Romero et al. (2019)   | Malaysia           | Mixed        | 3 | Questionnaires                      | 18  | In-class | University                       | -       | 4 |
| Engström et al. (2020) | Sweden, China,     | Mixed        | 2 | Observations, questionnaires,       | 34  | In-class | University                       | -       | 4 |

|                        |          |              |   |                                                                      |     |          |                          |         |   |
|------------------------|----------|--------------|---|----------------------------------------------------------------------|-----|----------|--------------------------|---------|---|
|                        | Denmark  |              |   | artifacts                                                            |     |          |                          |         |   |
| Osman et al. (2020)    | Malaysia | Quantitative | 2 | Tests,<br><br>questionnaires,<br><br>interviews                      | 138 | In-class | Secondary<br><br>Schools | A, C, D | 4 |
| Francese et al. (2015) | Italy    | Mixed        | 3 | Observations,<br><br>questionnaires, texts                           | 55  | In-class | University               | B, E    | 1 |
| Warin et al. (2015)    | France   | Mixed        | 4 | Observations,<br><br>questionnaires,<br><br>interviews,<br><br>texts | 41  | In-class | University               | C, E    | 2 |
| de-Juan et al. (2016)  | Spain    | Mixed        | 1 | Tests,<br><br>questionnaires                                         | 27  | In-class | University               | D, E    | 1 |

|                              |               |              |   |                                                        |     |              |                        |               |      |
|------------------------------|---------------|--------------|---|--------------------------------------------------------|-----|--------------|------------------------|---------------|------|
| Wu et al. (2016)             | United States | Mixed        | 3 | Observations,<br>questionnaires                        | 8   | In-class     | University             | A, D, E, F    | 2    |
| Chua et al. (2017)           | Malaysia      | Quantitative | 3 | Questionnaires                                         | 105 | In-class     | University             | A, C, E, F    | 1    |
| Shih et al. (2017)           | China         | Mixed        | 3 | Questionnaires,<br><br>observations,<br><br>interviews | 20  | Out-of-class | Primary<br><br>Schools | A, D, E       | 1, 2 |
| Gelonch-Bosch et al. (2019)  | Spain         | Mixed        | 3 | Questionnaires,<br><br>observations                    | -   | In-class     | University             | E             | 1    |
| Mantawy et al.<br><br>(2019) | United States | Mixed        | 3 | Questionnaires,<br><br>artifacts                       | 12  | In-class     | University             | A, C, E       | 1    |
| Isabelle (2020)              | Canada        | Mixed        | 1 | Observations,<br><br>questionnaires,                   | 269 | In-class     | University             | A, C, D, E, F | 1    |

|                              |        |              |   |                                                       |     |          |                          |         |      |
|------------------------------|--------|--------------|---|-------------------------------------------------------|-----|----------|--------------------------|---------|------|
|                              |        |              |   | artifacts                                             |     |          |                          |         |      |
| Yoon et al. (2015)           | Korea  | Mixed        | 1 | Questionnaires,<br><br>artifacts                      | 13  | In-class | University               | A, D, E | 1, 3 |
| Altanis et al. (2018)        | Greece | Mixed        | 1 | Questionnaires,<br><br>observations                   | 22  | In-class | Secondary<br><br>Schools | B, C, E | 3, 4 |
| Fuster-Guilló et al. (2019)  | Spain  | Quantitative | 3 | Questionnaires,<br><br>observations,<br><br>artifacts | 140 | In-class | University               | B, E    | 1, 3 |
| Rajkovic et al. (2019)       | Serbia | qualitative  | 4 | Interviews,<br><br>artifacts                          | 58  | In-class | University               | A, F    | 3, 4 |
| Rodríguez-Oroz et al. (2019) | Chile  | Quantitative | 4 | Tests,<br><br>questionnaires                          | 16  | In-class | University               | D,E     | 3, 4 |

|                                 |       |       |   |                                                                      |    |          |                        |      |      |
|---------------------------------|-------|-------|---|----------------------------------------------------------------------|----|----------|------------------------|------|------|
| Alden et al. (2020)             | Italy | Mixed | 4 | Questionnaires,<br><br>observations,<br><br>interviews               | 10 | In-class | Primary<br><br>Schools | B, E | 3, 4 |
| Hernández Gándara et al. (2020) | Spain | Mixed | 4 | Questionnaires,<br><br>observations,<br><br>Interviews,<br><br>texts | 44 | In-class | University             | E    | 2, 4 |

#### Research paradigm

- 1- Single-group pre-post-test design
- 2- inter-group experiments
- 3- Case study
- 4- Design-based study

#### Learning outcomes

- A-Learning and innovation skills
- B- Information, media and technology skills
- C-life and career skills

D-Subject knowledge and achievement

E-Learning experience and motivation

F-Meta-cognition and independent learning skills

Type of GPBL

1- Gamifying PBL procedure and activity

2- Gamifying PBL content and essence

3- Introduce ready-made educational/serious games in PBL

4- Using game making as the targeted product of PBL
